# Supplementary material for: MiR-146a in ALS: Contribution to Early Peripheral Nerve Degeneration and Relevance as Disease Biomarker
Source: MDPI journal article supplement (doi:10.3390/ijms24054610), 2023-02-27
Supplement: s1 [file s1]

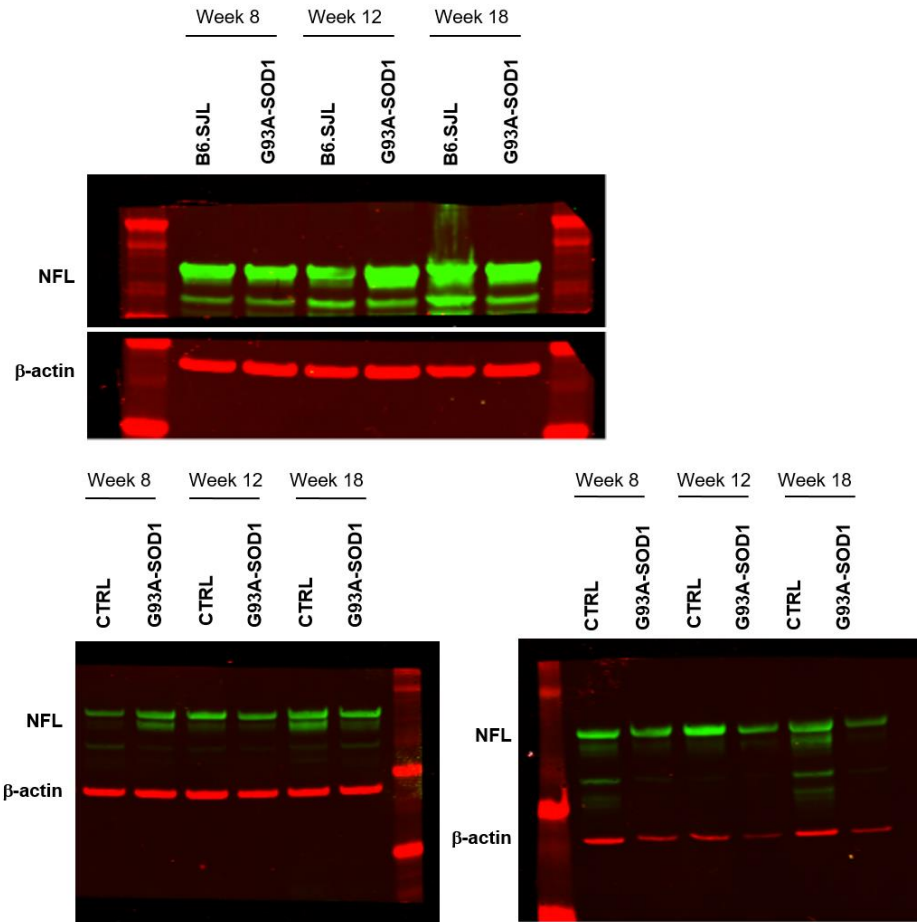

**Figure S1.** Original images of western blots reported in Figure 3. Representative Western blot analysis of NFL protein in sciatic nerve tissue of G93A-SOD1 and B6.SJL mice at week 8, 12, 18. Western blot images of NFL and  $\beta$ -actin proteins derived from the same electrophoretic gels. Western blot protocol was optimized three times obtaining the same results: one by cutting the membrane into small stripes at proper molecular weight, that were incubated separately with anti-NFL and anti- $\beta$ -actin antibodies, a “stripe puzzles” method reported in literature [Colciaghi, F. et al. Targeting PSD95-nNOS interaction by Tat-N-dimer peptide during status epilepticus is neuroprotective in MAM-pilocarpine rat model. *Neuropharmacology* 2019, *153*, 82–97] and two without cutting the membrane.
